# Supplementary material
Source: PubMed Central journal article supplement (PMC5866175)
Supplement: NIHMS917582-supplement.pdf [file NIHMS917582-supplement.pdf]

## SUPPLEMENTAL MATERIAL (ONLINE ONLY)

Online Figure 5: Kalman Filter Forecasts of Glaucoma Progression for Different Subsets of Patients from the Testing Dataset When Intraocular Pressures Are Raised or Lowered to Different Levels

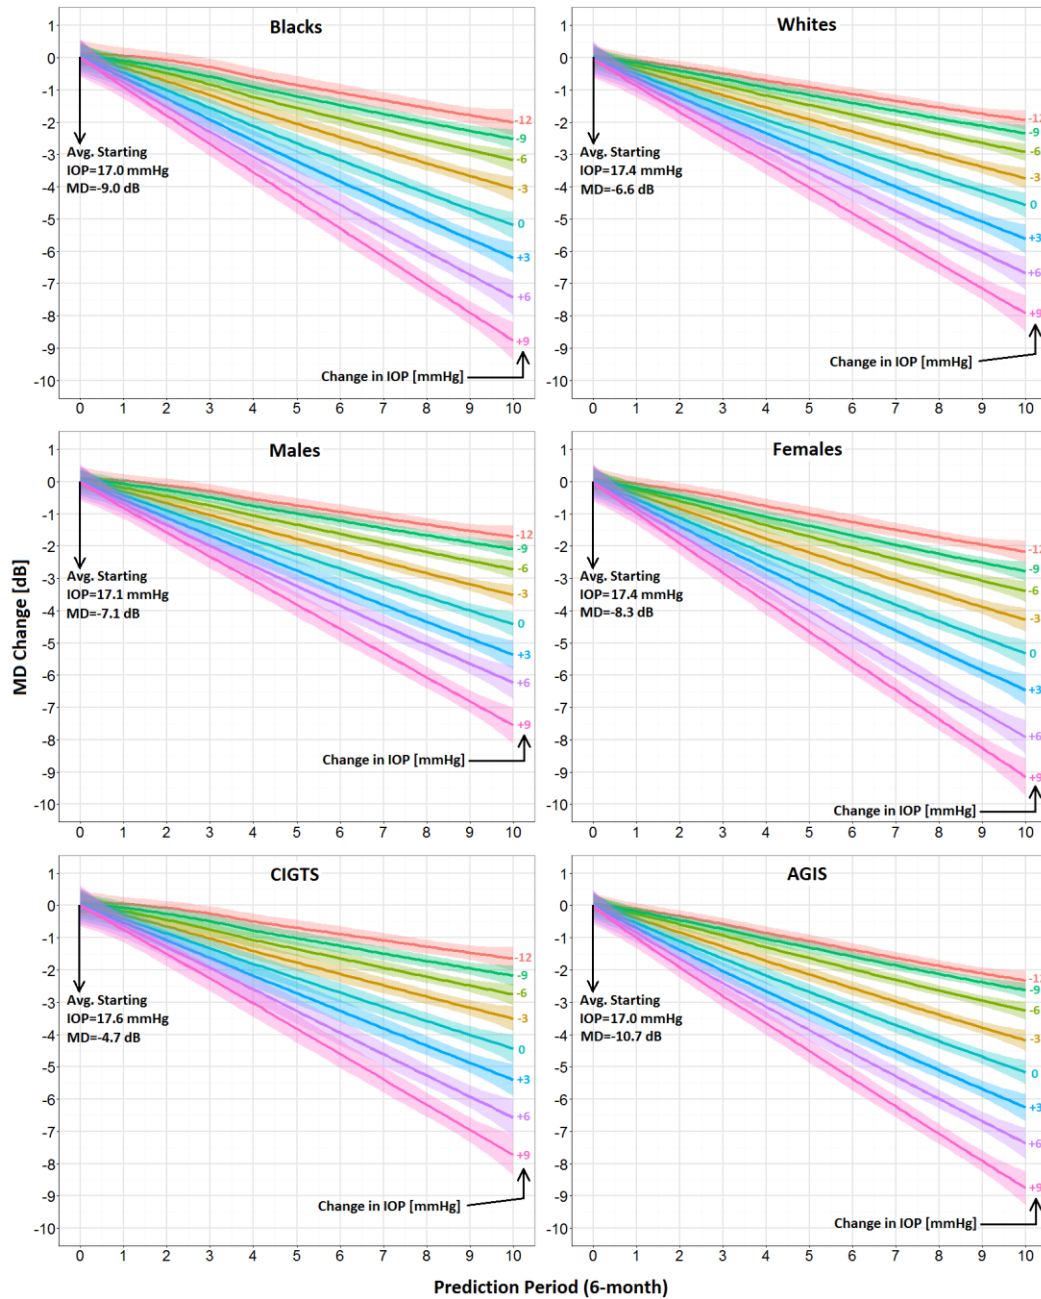

IOP = intraocular pressure; MD = mean deviation; mmHg = millimeter of mercury; dB = decibels; AGIS = Advanced Glaucoma Intervention Study; CIGTS = Collaborative Initial Glaucoma Treatment Study. Avg = average.

Average change in MD over the next 5 years under different levels of change in IOP graphed for (a) blacks vs. whites, (b) males vs. females, and (c) participants of CIGTS vs. AGIS. The lines and the bounds around each line represent the mean and the 95% confidence interval around it, respectively. Our models found no statistically significant difference between these groups of patients (all p-values were >0.05).
